# Supplementary material for: Geographic disparities and temporal changes of diabetes-related mortality risks in Florida: a retrospective study
Source: PeerJ. 2024 Jun 27;12:e17408. doi: 10.7717/peerj.17408 (PMC11214742; doi:10.7717/peerj.17408)
Supplement: Supplemental Information 1 [file peerj-12-17408-s001.xlsx]

## Sheet: Study Data
County	FIPS	N_death_2010	pop_2010	M_risk_2010	N_death_2011	pop_2011	M_risks_2011	N_death_2012	pop_2012	M_risks_2012	N_death_2013	pop_2013	M_risks_2013	N_death_2014	pop_2014	M_risks_2014	N_death_2015	pop_2015	M_risks_2015	N_death_2016	pop_2016	M_risks_2016	N_death_2017	pop_2017	M_risks_2017	N_death_2018	pop_2018	M_risks_2018	N_death_2019	pop_2019	M_risks_2019
ALACHUA	12001	44	247669	17.7656	61	247151	24.6813	56	246893	22.6819	71	248526	28.5684	80	251760	31.7763	60	255631	23.4713	56	257478	21.7494	63	259349	24.2916	52	263753	19.7154	73	266649	27.3768
BAKER	12003	8	27070	29.553	5	26915	18.577	8	26926	29.7111	7	26895	26.0271	5	27012	18.5103	8	27003	29.6263	11	26967	40.7906	5	27066	18.4734	6	27488	21.8277	10	28089	35.6011
BAY	12005	54	168957	31.9608	49	169311	28.9408	62	169477	36.5831	73	170004	42.9402	83	171285	48.4572	85	174016	48.8461	84	176637	47.5552	71	178953	39.6752	78	182218	42.8059	65	179900	36.1312
BRADFORD	12007	11	28479	38.625	13	28385	45.7988	14	27083	51.6929	9	27278	32.9936	11	27317	40.268	6	27325	21.9579	4	27498	14.5465	12	27808	43.153	9	28083	32.0479	10	28455	35.1432
BREVARD	12009	164	543627	30.1677	161	545304	29.5248	155	546128	28.3816	157	549144	28.59	169	554431	30.4817	153	563818	27.1364	193	570496	33.8302	166	576970	28.771	186	584050	31.8466	153	593372	25.7848
BROWARD	12011	293	1748502	16.7572	314	1756730	17.8741	323	1774943	18.1978	276	1788781	15.4295	335	1809422	18.5142	372	1834008	20.2834	376	1860979	20.2044	434	1884545	23.0294	396	1903210	20.807	430	1927014	22.3143
CALHOUN	12013	7	14640	47.8142	9	14685	61.287	5	14631	34.174	7	14617	47.8894	10	14579	68.5918	1	14550	6.87285	10	14594	68.5213	4	14658	27.2889	9	15315	58.7659	7	14982	46.7227
CHARLOTTE	12015	68	160012	42.4968	76	161115	47.1713	66	163682	40.3221	51	163703	31.154	51	164987	30.9115	64	167966	38.1029	58	171219	33.8747	78	173954	44.8394	81	175413	46.1767	86	182298	47.1755
CITRUS	12017	66	141136	46.7634	69	140912	48.9667	72	140685	51.1782	60	140539	42.6928	71	140917	50.3843	64	141830	45.1244	84	143458	58.5537	83	144922	57.2722	100	145164	68.8876	81	147735	54.8279
CLAY	12019	57	190982	29.8457	55	191336	28.7452	60	192132	31.2285	47	193713	24.2627	48	198500	24.1814	49	202229	24.23	53	206387	25.6799	41	210767	19.4528	44	213565	20.6026	57	217109	26.2541
COLLIER	12021	43	322052	13.3519	54	325054	16.6126	56	331136	16.9115	53	334255	15.8562	68	338270	20.1023	56	345528	16.2071	60	351768	17.0567	74	358506	20.6412	78	367471	21.2262	71	377700	18.798
COLUMBIA	12023	24	67549	35.5298	32	67581	47.3506	24	67684	35.4589	31	67519	45.913	35	67924	51.5282	25	68251	36.6295	35	68687	50.9558	26	69250	37.5451	28	69566	40.2495	30	70614	42.4845
DESOTO	12027	12	34837	34.4461	8	34628	23.1027	6	34375	17.4545	17	34368	49.4646	10	34490	28.9939	12	34876	34.4076	10	35215	28.397	17	35454	47.9495	18	35940	50.0835	27	35718	75.5921
DIXIE	12029	9	16412	54.8379	9	16363	55.0021	7	16279	43.0002	12	16279	73.7146	5	16376	30.5325	4	16531	24.197	6	16844	35.621	11	17040	64.554	8	16767	47.7128	9	16516	54.4926
DUVAL	12031	236	864680	27.2933	268	865427	30.9674	214	871038	24.5684	242	878948	27.5329	218	893858	24.3887	240	909960	26.3748	233	927903	25.1104	259	942841	27.4702	264	954454	27.6598	246	971842	25.3128
ESCAMBIA	12033	106	297830	35.5908	84	299442	28.0522	96	299718	32.0301	98	301757	32.4765	112	304654	36.763	88	307730	28.5965	93	310642	29.938	87	312811	27.8123	99	317051	31.2253	92	322901	28.4917
FLAGLER	12035	31	95812	32.355	33	96443	34.2171	43	97347	44.1719	38	98062	38.751	34	99646	34.1208	36	101826	35.3544	34	103584	32.8236	40	106076	37.7088	55	108481	50.7001	45	110636	40.6739
FRANKLIN	12037	2	11530	17.3461	3	11529	26.0213	4	11525	34.7072	4	11613	34.4442	5	11823	42.2905	8	11852	67.4992	4	11937	33.5093	4	12006	33.3167	1	12360	8.09061	2	12017	16.6431
GADSDEN	12039	24	46788	51.2952	18	48259	37.2987	14	47376	29.5508	26	47729	54.4742	20	48174	41.5162	19	48356	39.2919	20	48527	41.2142	20	48690	41.0762	16	48173	33.2136	21	47926	43.8176
GILCHRIST	12041	5	16955	29.4898	7	16980	41.225	11	16929	64.9773	8	16869	47.4243	6	16849	35.6104	5	16837	29.6965	7	16862	41.5135	8	16977	47.1226	5	17578	28.4446	9	17682	50.8992
GLADES	12043	4	12866	31.0897	4	12776	31.3087	8	12646	63.2611	7	12704	55.1008	5	12862	38.8742	3	12881	23.2901	4	13101	30.532	3	13263	22.6193	4	13193	30.3191	5	13098	38.1738
GULF	12045	8	15815	50.5849	9	15808	56.9332	6	15935	37.653	9	16230	55.4529	10	16527	60.507	17	16364	103.887	7	16718	41.871	11	16957	64.87	4	16235	24.6381	5	16507	30.2902
HAMILTON	12047	3	14782	20.295	7	14775	47.3773	5	14787	33.8135		14424	0	2	14404	13.885	4	14665	27.2758	6	14666	40.911	8	14749	54.241	4	14706	27.1998	6	14787	40.5762
HARDEE	12049	7	27524	25.4323	8	27673	28.909	14	27755	50.4414	13	27681	46.9636	11	27704	39.7055	7	27634	25.3311	13	27643	47.0282	14	27675	50.5872	13	27436	47.383	16	27311	58.5845
HENDRY	12051	10	40955	24.417	14	38734	36.144	10	37991	26.322	12	37806	31.741	16	37939	42.173	16	38160	41.9287	9	38436	23.4155	14	38675	36.1991	13	39682	32.7604	11	40089	27.4389
HERNANDO	12053	97	172799	56.1346	93	173063	53.7377	86	173214	49.6496	83	174053	47.6866	110	175338	62.736	85	177434	47.9051	109	180213	60.484	94	183065	51.3479	140	185421	75.5039	109	189661	57.471
HIGHLANDS	12055	55	98713	55.7171	60	98767	60.749	84	98980	84.8656	58	99215	58.4589	58	100055	57.9681	45	100955	44.5743	53	101727	52.1002	71	102590	69.2075	36	103317	34.8442	43	103391	41.5897
HILLSBOROUGH	12057	307	1231553	24.9279	310	1242491	24.9499	267	1260887	21.1756	294	1282511	22.9238	307	1307906	23.4726	299	1331997	22.4475	272	1359850	20.0022	305	1388111	21.9723	299	1419285	21.0669	305	1445243	21.1037
HOLMES	12059	7	19894	35.1865	6	19920	30.1205	5	19997	25.0038	8	20031	39.9381	7	19994	35.0105	4	19907	20.0934	10	20037	49.9077	5	20132	24.8361	10	20404	49.01	11	20218	54.407
INDIAN RIVER	12061	82	138110	59.373	74	138913	53.2708	26	139487	18.6397	33	139787	23.6073	37	141468	26.1543	32	144062	22.2127	37	147163	25.1422	40	149930	26.6791	54	152079	35.5079	56	155308	36.0574
JACKSON	12063	5	49759	10.0484	23	49949	46.047	10	49897	20.0413	15	50202	29.8793	18	50282	35.7981	12	50461	23.7807	21	50311	41.7404	18	50303	35.7832	15	50689	29.5922	22	50325	43.7158
JEFFERSON	12065	5	14724	33.9582	5	14614	34.2138	2	14475	13.8169	3	14579	20.5775	5	14583	34.2865	4	14506	27.5748	8	14501	55.1686	11	14530	75.7054	8	14725	54.3294	8	14842	53.9011
LAFAYETTE	12067	2	8864	22.5632	0	8712	0	5	8647	57.8235	9	8632	104.263	2	8700	22.9885	2	8649	23.1241	5	8620	58.0046	5	8651	57.7968	0	8367	0	1	8613	11.6104
LAKE	12069	113	297367	38.0002	90	298509	30.1498	98	300314	32.6325	123	304740	40.3623	110	311436	35.3203	106	318366	33.295	136	325887	41.7323	143	333598	42.866	146	342356	42.6457	170	354537	47.9499
LEE	12071	125	620039	20.16	101	628356	16.0737	131	639878	20.4727	184	645271	28.5152	173	656466	26.3532	173	669297	25.848	252	684465	36.8171	226	700837	32.2472	227	721053	31.4817	226	734630	30.7638
LEON	12073	40	275734	14.5067	45	276621	16.2677	48	277824	17.2771	47	278909	16.8514	54	282109	19.1415	35	285233	12.2707	45	288495	15.5982	63	291879	21.5843	70	290223	24.1194	64	296717	21.5694
LEVY	12075	18	40789	44.1295	24	40673	59.0072	21	40282	52.1325	22	40350	54.5229	24	40479	59.29	21	40457	51.907	17	40599	41.873	14	40832	34.2868	23	41550	55.355	11	41354	26.5996
LIBERTY	12077	3	8326	36.0317	3	8406	35.6888	3	8516	35.2278	2	8514	23.4907	4	8693	46.014	2	8701	22.9859	3	8754	34.27	1	8839	11.3135	2	8781	22.7764	2	9167	21.8174
MADISON	12079	6	19206	31.2402	4	19285	20.7415	8	19256	41.5455	3	19400	15.4639	6	19265	31.1446	8	19200	41.6667	6	19252	31.1656	8	19295	41.4615	7	19420	36.0453	9	19533	46.0759
MANATEE	12081	56	323440	17.3139	70	326968	21.4088	67	331243	20.2268	62	334924	18.5117	65	341782	19.018	70	351617	19.908	86	359486	23.923	96	367130	26.1488	103	381071	27.0291	111	388729	28.5546
MARION	12083	116	331314	35.0121	141	331959	42.4751	125	333446	37.4873	164	335551	48.8748	135	338269	39.9091	150	342290	43.8225	183	346956	52.7444	190	352067	53.967	155	355325	43.622	200	360053	55.5474
MARTIN	12085	23	146434	15.7067	32	146778	21.8016	28	147427	18.9925	24	148189	16.1955	19	148900	12.7602	22	150331	14.6344	39	151081	25.814	36	152333	23.6324	42	155705	26.9741	44	158006	27.847
MIAMI-DADE	12086	661	2498855	26.4521	580	2524253	22.9771	635	2559713	24.8075	624	2589743	24.0951	665	2622804	25.3545	712	2665425	26.7124	759	2712144	27.9852	787	2754749	28.5688	744	2804160	26.532	702	2830500	24.8013
MONROE	12087	14	72946	19.1923	21	72668	28.8986	10	73039	13.6913	10	73735	13.5621	8	74028	10.8067	11	74551	14.755	10	76461	13.0786	22	77300	28.4605	16	76534	20.9057	14	73253	19.1118
NASSAU	12089	13	73455	17.6979	26	73671	35.292	10	73922	13.5278	10	74841	13.3617	9	75569	11.9096	20	76867	26.019	14	78174	17.9088	17	79592	21.3589	14	83125	16.8421	11	85135	12.9207
OKALOOSA	12091	56	180881	30.9596	49	182951	26.7831	49	187920	26.0749	45	188758	23.84	52	191126	27.2072	70	192118	36.4359	46	193247	23.8037	67	194811	34.3923	68	198409	34.2726	61	201104	30.3326
OKEECHOBEE	12093	13	39976	32.5195	11	39845	27.607	17	39790	42.7243	12	39770	30.1735	10	39851	25.0935	8	40208	19.8965	11	40983	26.8404	15	41469	36.1716	12	41492	28.9212	12	41347	29.0227
ORANGE	12095	227	1148556	19.7639	236	1161006	20.3272	247	1182287	20.8917	256	1209579	21.1644	251	1233931	20.3415	241	1259067	19.1412	221	1287703	17.1623	268	1317704	20.3384	280	1370447	20.4313	251	1389297	18.0667
OSCEOLA	12097	55	269062	20.4414	56	275464	20.3293	46	282802	16.2658	62	289971	21.3814	61	298228	20.4541	43	311980	13.7829	54	326342	16.5471	77	339470	22.6824	80	360426	22.196	77	368678	20.8854
PALM BEACH	12099	277	1320309	20.9799	245	1327798	18.4516	253	1337906	18.9101	260	1348740	19.2773	276	1364815	20.2225	266	1382134	19.2456	299	1395117	21.4319	320	1411054	22.6781	287	1442281	19.899	351	1458576	24.0646
PASCO	12101	177	465118	38.0549	165	466873	35.3415	162	469592	34.498	177	474903	37.2708	191	481215	39.6912	199	489691	40.6379	197	497991	39.5589	221	507081	43.5828	239	518639	46.0821	237	527174	44.9567
PINELLAS	12103	293	916501	31.9694	328	918847	35.6969	313	921628	33.9616	335	928107	36.095	327	935833	34.9421	331	947783	34.9236	330	956302	34.5079	347	961253	36.0987	365	971022	37.5893	322	979558	32.872
POLK	12105	140	602442	23.2388	141	605141	23.3004	187	608174	30.7478	170	616211	27.588	174	625439	27.8205	202	636234	31.7493	210	650552	32.2803	225	663999	33.8856	232	681691	34.033	238	688770	34.5544
PUTNAM	12107	43	74276	57.8922	38	73864	51.4459	40	72965	54.8208	65	72545	89.5996	46	72564	63.3923	59	72821	81.0206	52	73004	71.229	42	73068	57.4807	37	73422	50.3936	51	73012	69.8515
SANTA ROSA	12109	29	190646	16.785	37	193516	12.9188	30	197262	23.3192	31	203022	18.7172	29	208934	12.9227	45	215185	19.9828	46	222006	21.621	31	229272	16.5742	38	241545	16.1461	47	249734	16.4175
SARASOTA	12111	81	278267	28.7494	94	279907	29.6527	88	280530	29.2304	91	281371	28.4322	88	283817	29.2442	89	289055	23.8709	108	294144	31.6172	121	299962	35.0044	110	304743	38.393	98	309073	39.1493
SEMINOLE	12113	107	152174	19.0571	91	155225	23.8364	121	155674	19.271	110	157923	19.6298	100	160475	18.0714	111	163892	27.4571	102	168026	27.3767	110	171851	18.0389	108	175552	21.646	105	179875	26.1293
ST JOHNS	12115	32	379741	21.3303	25	381881	24.615	46	384157	22.9073	38	385619	23.5984	27	388037	22.6782	43	393850	22.5974	48	401316	26.9115	38	407501	29.6932	39	415896	26.4489	41	426977	22.9521
ST LUCIE	12117	80	422979	25.2968	83	425398	21.3917	82	428790	28.2189	80	432336	25.4432	83	438606	22.7995	69	444403	24.9773	93	450706	22.6312	105	457028	24.0685	117	463627	23.2946	121	472775	22.2093
SUMTER	12119	33	94234	35.0192	35	97440	35.9195	36	101273	35.5475	38	106591	35.6503	46	112466	40.9013	36	116440	30.9172	51	119433	42.7018	61	123928	49.2221	81	125779	64.3987	71	130642	54.347
SUWANNEE	12121	26	41883	62.0777	17	43489	39.0903	12	43818	27.386	10	43923	22.7671	19	44263	42.9252	11	44449	24.7475	33	44340	74.4249	17	44527	38.1791	13	45123	28.8101	13	45482	28.5827
TAYLOR	12123	18	22529	79.897	16	22570	70.8906	10	22969	43.5369	10	23002	43.4745	17	22916	74.184	19	22752	83.5091	19	22400	84.8214	13	22220	58.5059	21	22258	94.3481	16	22652	70.6339
UNION	12125	0	15567	0	3	15471	19.3911	3	15506	19.3473	2	15499	12.9041	3	15724	19.0791	7	15934	43.9312	8	15873	50.4001	10	15896	62.9089	10	15966	62.6331	6	15985	37.5352
VOLUSIA	12127	172	494617	34.7744	190	495835	38.3192	219	497494	44.0206	226	499893	45.2097	225	505420	44.5174	226	512247	44.1193	196	519037	37.7622	239	525121	45.5133	241	532926	45.222	237	539563	43.9244
WAKULLA	12129	5	30818	16.2243	6	30856	19.4452	6	30758	19.5071	12	30974	38.7422	4	31310	12.7755	4	31323	12.7702	11	31706	34.6937	5	32134	15.5598	11	32350	34.0031	7	32418	21.5929
WALTON	12131	29	55060	52.6698	29	55794	51.9769	19	57177	33.2301	16	58233	27.4758	15	60076	24.9684	13	61111	21.2728	18	63562	28.3188	21	65724	31.9518	25	67926	36.8048	16	70352	22.7428
WASHINGTON	12133	14	24862	56.3108	13	24679	52.6764	11	24921	44.1395	8	24805	32.2516	17	24989	68.0299	12	24952	48.0923	18	24880	72.3473	14	24935	56.146	14	25243	55.4609	14	25347	55.2334

## Sheet: Data Dictionary
	County	Name of county
	FIPS	Geocode of county
	N_death_2010	Number of diabetes-associated death in 2010
	pop_2010	Number of population in 2010
	M_risk_2010	Diabetes-associated mortality risks per 100000 population in 2010
	N_death_2011	Number of diabetes-associated death in 2011
	pop_2011	Number of population in 2011
	M_risk_2011	Diabetes-associated mortality risks per 100000 population in 2011
	N_death_2012	Number of diabetes-associated death in 2012
	pop_2012	Number of population in 2012
	M_risk_2012	Diabetes-associated mortality risks per 100000 population in 2012
	N_death_2013	Number of diabetes-associated death in 2013
	pop_2013	Number of population in 2013
	M_risk_2013	Diabetes-associated mortality risks per 100000 population in 2013
	N_death_2014	Number of diabetes-associated death in 2014
	pop_2014	Number of population in 2014
	M_risk_2014	Diabetes-associated mortality risks per 100000 population in 2014
	N_death_2015	Number of diabetes-associated death in 2015
	pop_2015	Number of population in 2015
	M_risk_2015	Diabetes-associated mortality risks per 100000 population in 2015
	N_death_2016	Number of diabetes-associated death in 2016
	pop_2016	Number of population in 2016
	M_risk_2016	Diabetes-associated mortality risks per 100000 population in 2016
	N_death_2017	Number of diabetes-associated death in 2017
	pop_2017	Number of population in 2017
	M_risk_2017	Diabetes-associated mortality risks per 100000 population in 2017
	N_death_2018	Number of diabetes-associated death in 2018
	pop_2018	Number of population in 2018
	M_risk_2018	Diabetes-associated mortality risks per 100000 population in 2018
	N_death_2019	Number of diabetes-associated death in 2019
	pop_2019	Number of population in 2019
	M_risk_2019	Diabetes-associated mortality risks per 100000 population in 2019
